# Supplementary material for: Dissecting the pathophysiology of immune thrombotic thrombocytopenic purpura: interplay between genes and environmental triggers
Source: PubMed Central journal article supplement — Haematologica. 2018 Apr 19;103(7):1099–109. doi: 10.3324/haematol.2016.151407 (PMC6029525; doi:10.3324/haematol.2016.151407), 2018-07
Supplement: 2016_151407-Disclosures_and_Contributions.pdf [file 2016_151407-Disclosures_and_Contributions.pdf]

Haematologica  
HAEMATOL/2016/151407  
Version 3

Dissecting the pathophysiology of immune thrombotic  
thrombocytopenic purpura: interplay between genes and environmental  
triggers

Johana Hrdinová, Silvia D'Angelo, Nuno A. G. Graça, Bogac Ercig,  
Karen Vanhoorelbeke, Agnès Veyradier, Jan Voorberg, and Paul  
Coppo

Disclosures: none

Contributions: All authors wrote the manuscript, JH and BE prepared the figures, all authors critically reviewed the final version of manuscript.
