# Supplementary material for: Dissecting the pathophysiology of immune thrombotic thrombocytopenic purpura: interplay between genes and environmental triggers
Source: PubMed Central journal article supplement — Haematologica. 2018 Apr 19;103(7):1099–109. doi: 10.3324/haematol.2016.151407 (PMC6029525; doi:10.3324/haematol.2016.151407), 2018-07
Supplement: HAEMATOL-2016-151407v3-Hrdinova-01.pdf [file HAEMATOL-2016-151407v3-Hrdinova-01.pdf]

# Immunopathogenesis of thrombotic thrombocytopenic purpura

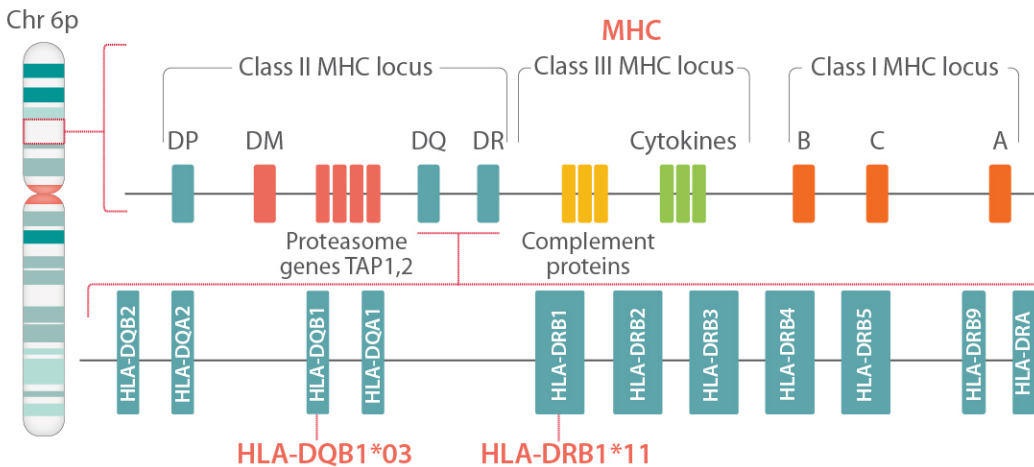

- HLA-DQB1\*03 and HLA-DRB1\*11 are genetic factors involved in the loss of tolerance of the immune system towards ADAMTS13

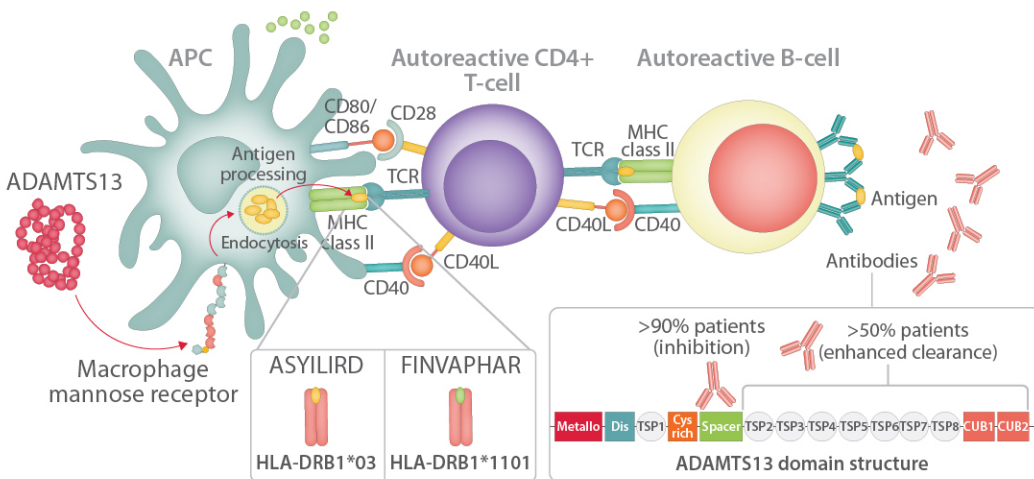

- ADAMTS13 is endocytosed by APC and processed to peptides (FINVAPHAR and ASYLIRD) that are loaded on MHC-II molecules

- The complex MHC- II/peptide will get recognized by TCR, which will cause the activation of the CD4+ T-cell

- Such activated CD4+ T-cell will help autoreactive B-cell to produce ADAMTS13-specific auto-Abs
